# Supplementary material for: Subglacial carbonate deposits as a potential proxy for glacier's existence
Source: Copernicus journal article supplement (doi:10.5194/tc-2020-82), 2020-04-30
Supplement: Supplementary file 1 [file tc-2020-82-supplement.pdf]

## Subglacial carbonate deposits as a potential proxy for glacier's existence

**Authors:** Matej Lipar<sup>1\*</sup>, Andrea Martín Pérez<sup>2</sup>, Jure Tičar<sup>1</sup>, Miha Pavšek<sup>1</sup>, Matej Gabrovec<sup>1</sup>, Mauro Hrvatin<sup>1</sup>, Blaž Komac<sup>1</sup>, Matija Zorn<sup>1</sup>, Nadja Zupan Hajna<sup>3</sup>, Jian-Xin Zhao<sup>4</sup>, Mateja Ferk<sup>1</sup>

<sup>1</sup>Anton Melik Geographical Institute, Research Centre of the Slovenian Academy of Sciences and Arts, Ljubljana, 1000, Slovenia

<sup>2</sup>Ivan Rakovec Institute of Palaeontology, Research Centre of the Slovenian Academy of Sciences and Arts, Ljubljana, 1000, Slovenia

<sup>3</sup>Karst Research Institute, Research Centre of the Slovenian Academy of Sciences and Arts, Postojna, 6230, Slovenia

<sup>4</sup>School of Earth and Environmental Sciences, The University of Queensland, Brisbane, QLD 4072, Australia

*Correspondence to:* Matej Lipar (matej.lipar@zrc-sazu.si)

## Supplementary Information

Supplementary Figure S1: Photographic material of the retreating Triglav Glacier (© ZRC SAZU Anton Melik Geographical Institute archive).

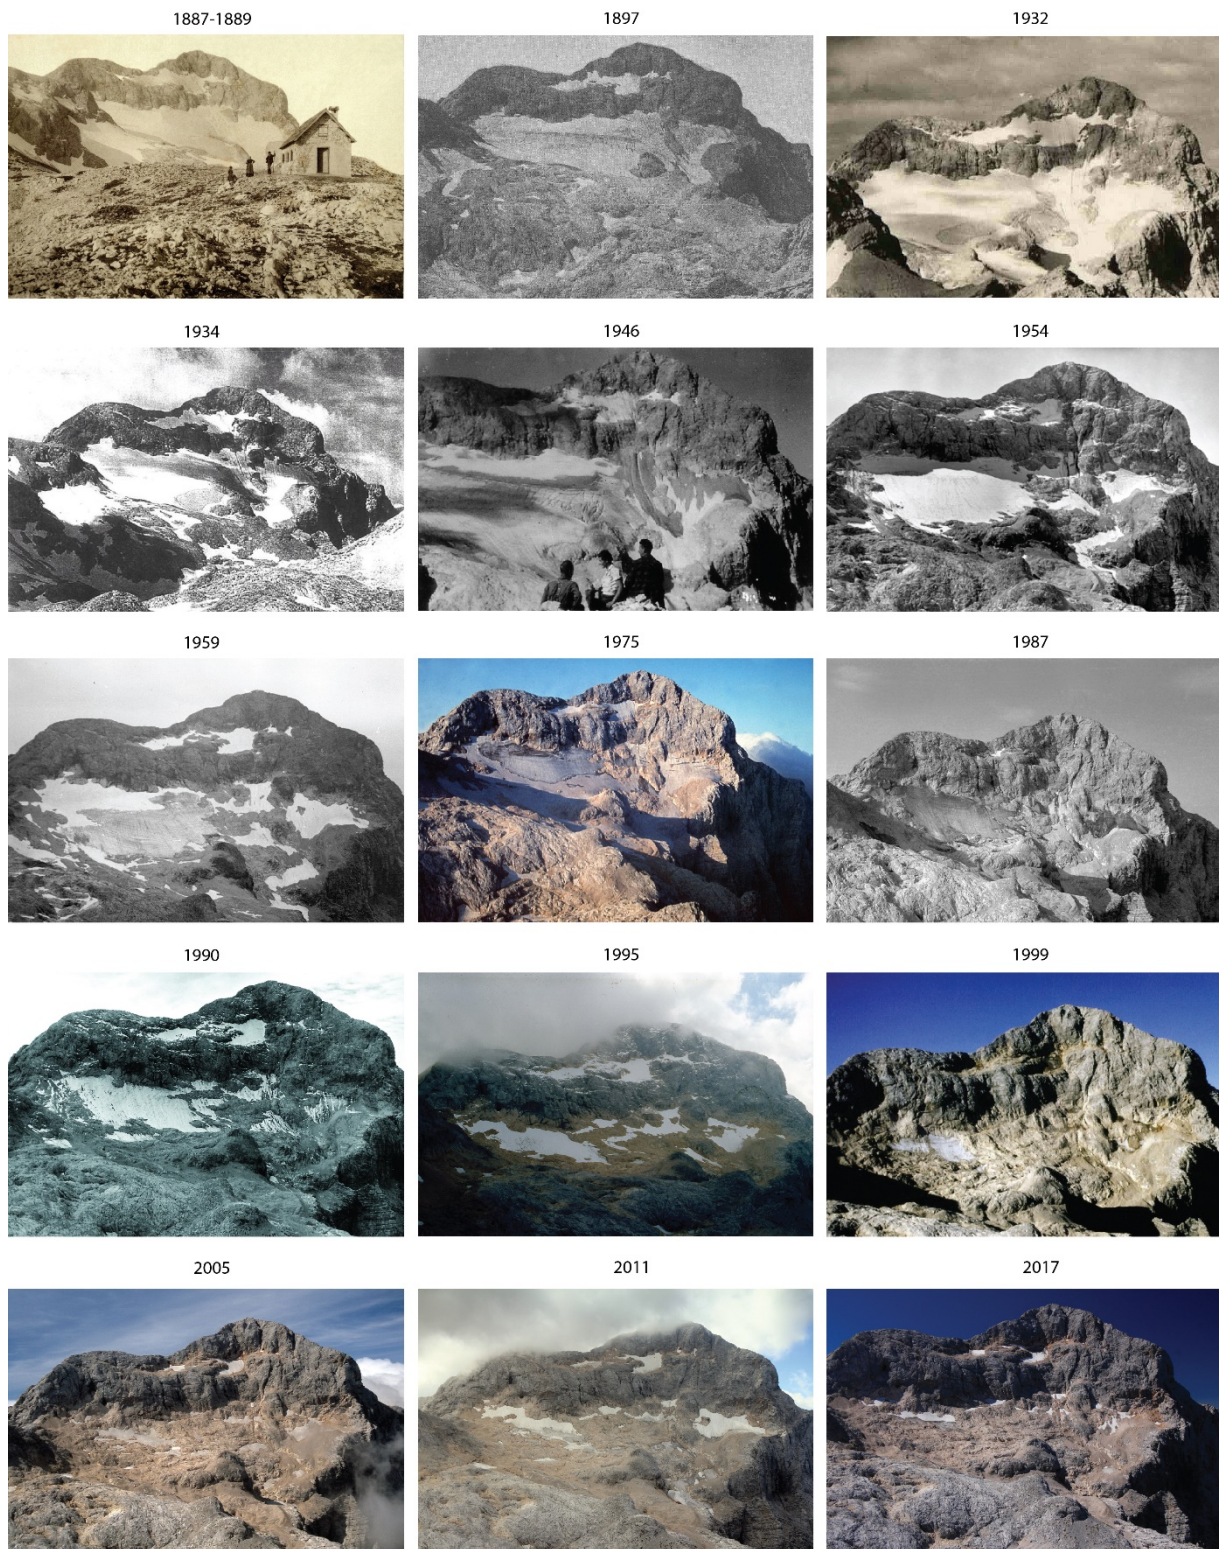

Supplementary Figure S2: The recently exposed surface with shafts and subglacial carbonate deposits (© ZRC SAZU Anton Melik Geographical Institute archive).

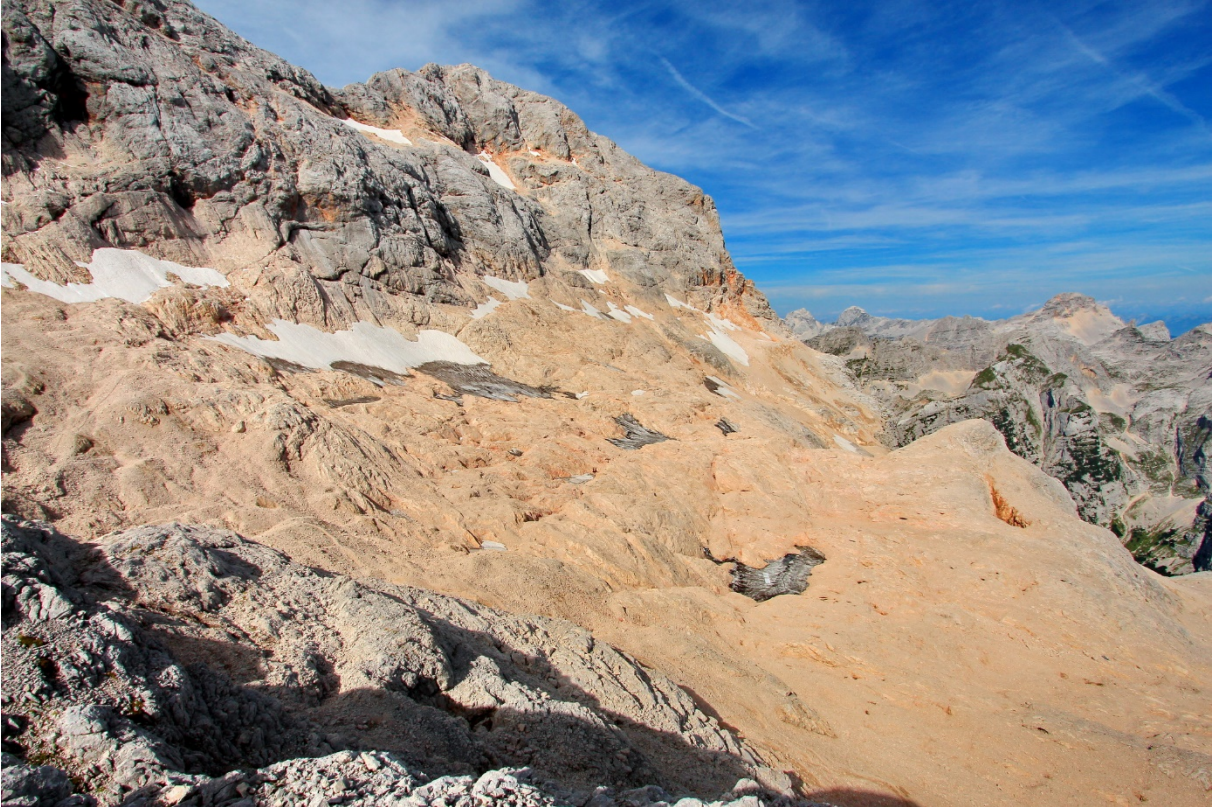

Supplementary Figure S3: General view of the subglacial carbonate location (© ZRC SAZU Anton Melik Geographical Institute archive).

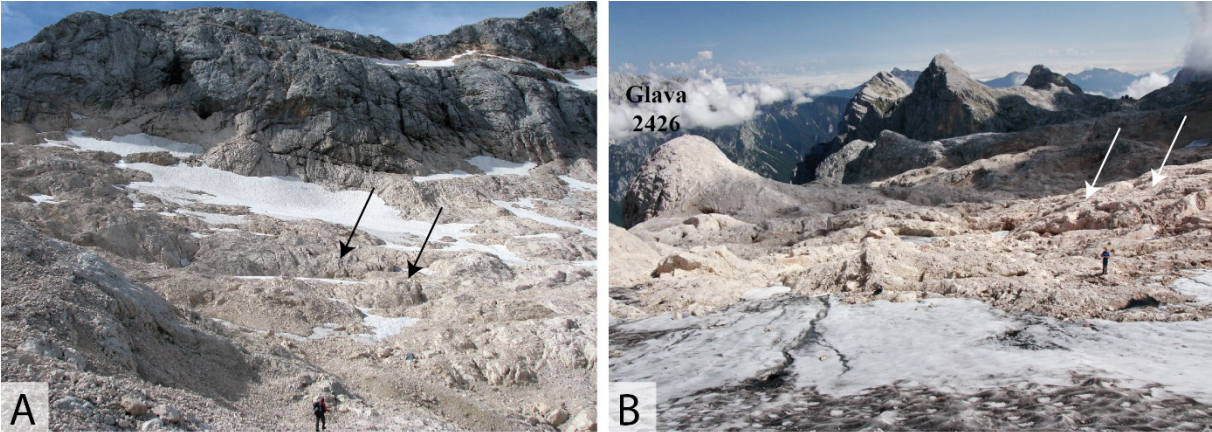

Supplementary Figure S4: Locality LiDAR DTM map of the Triglav Glacier extent and the sampling sites discussed in the text.

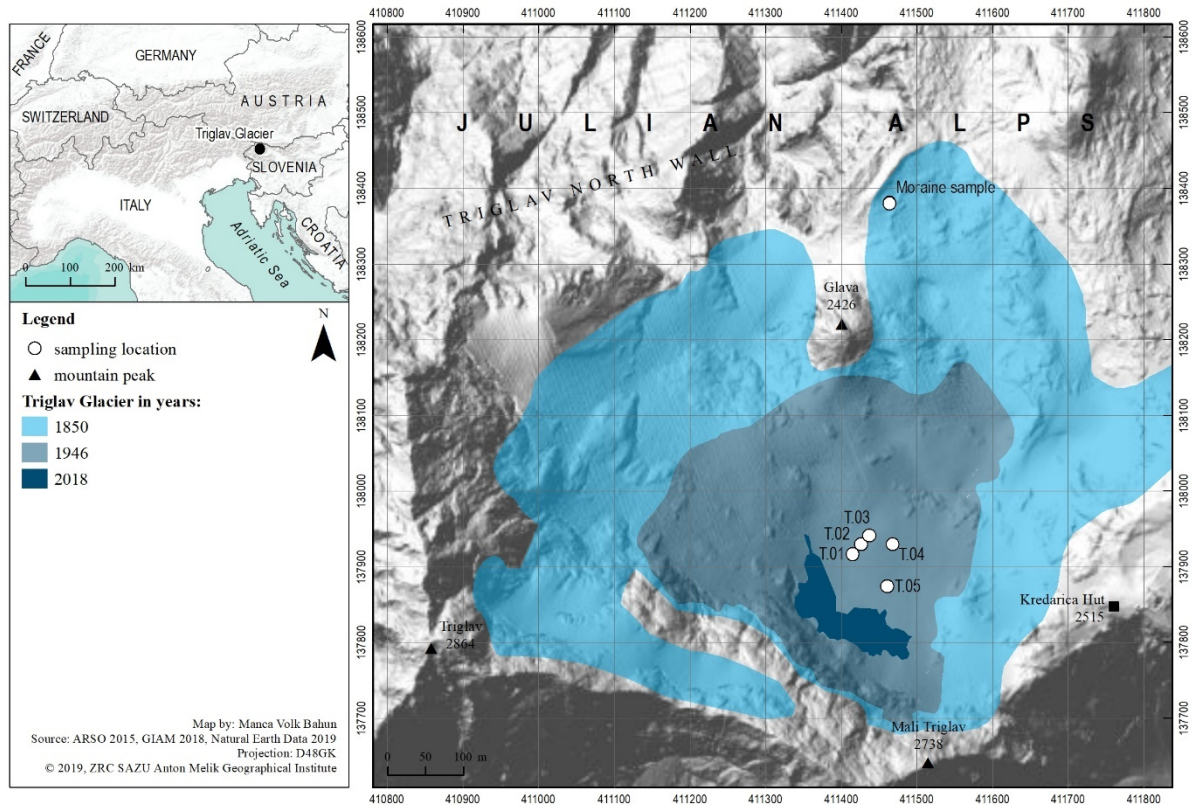

Supplementary Figure S5: Locality aerial map of the Triglav Glacier, the sampling sites discussed in the text, and general geomorphology.

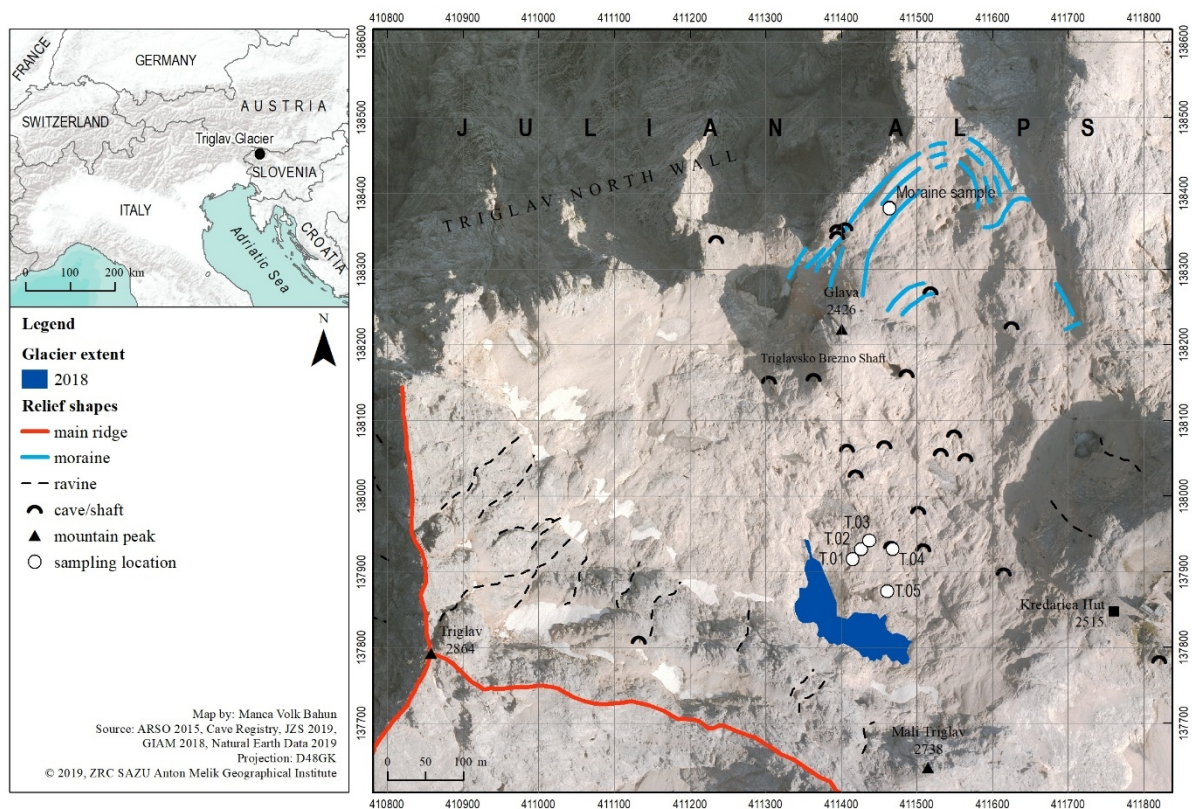

Supplementary Figure S6: Average melting season temperature (May – October) on meteorological station Kredarica (Fig. 1) between 1955 and 2018. Source: Slovenian Environment Agency.

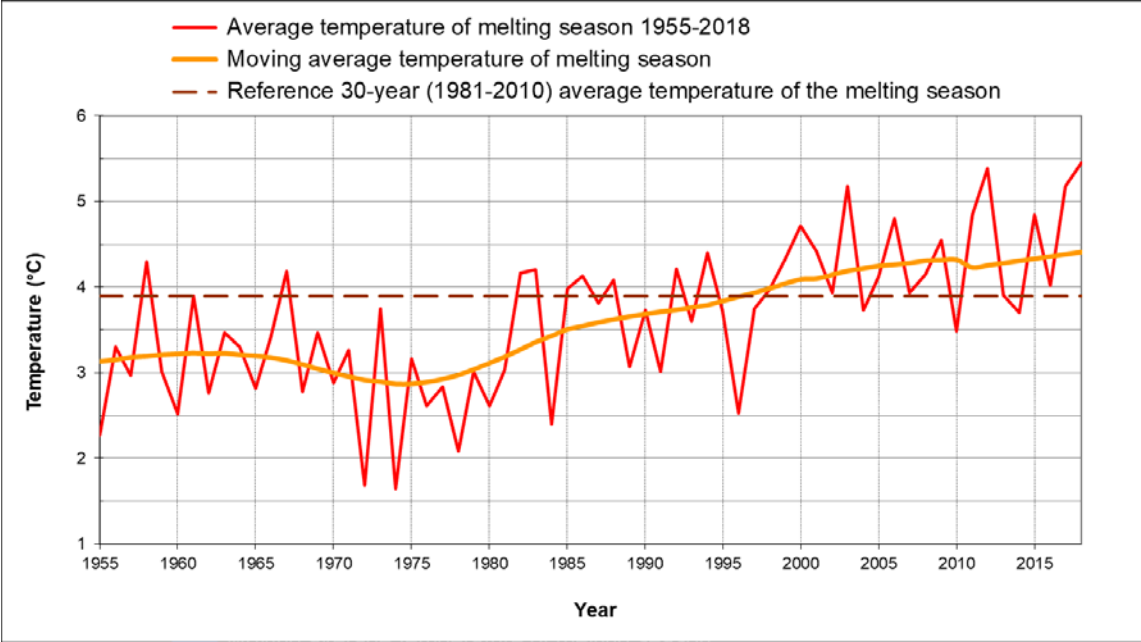

Supplementary Figure S7: Reconstruction of the highest seasonal snow height on the edge of the Triglav Glacier between 1852 and 2018. Updated from Gabrovec et al. 2014(Gabrovec et al., 2014). Source: Slovenian Environment Agency (from 1955 on), reconstruction/reanalysis before 1955 done by Jaka Ortar.

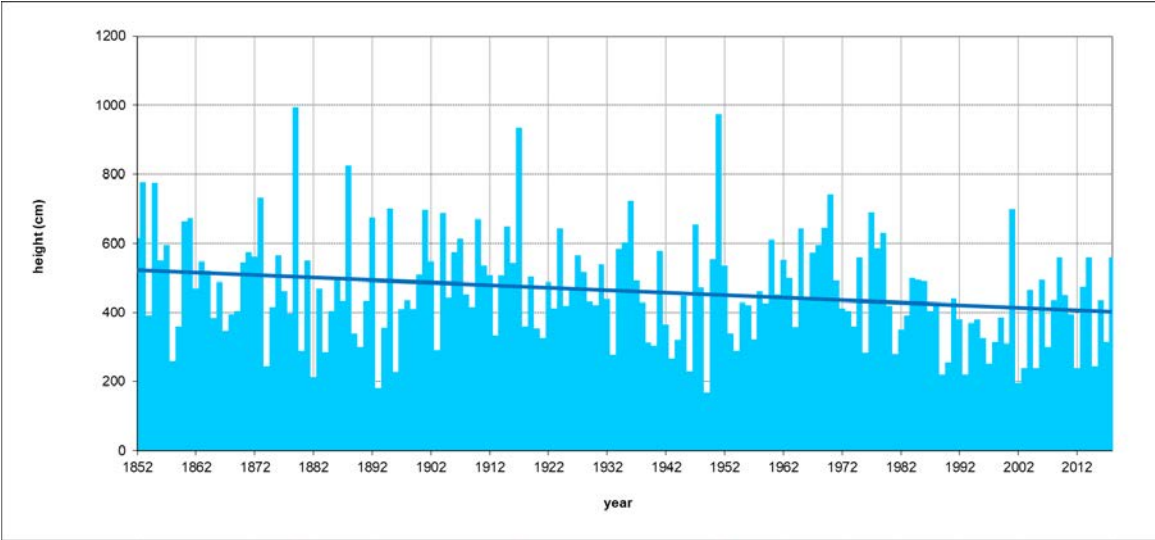

Supplementary Figure S8: XRD graphs

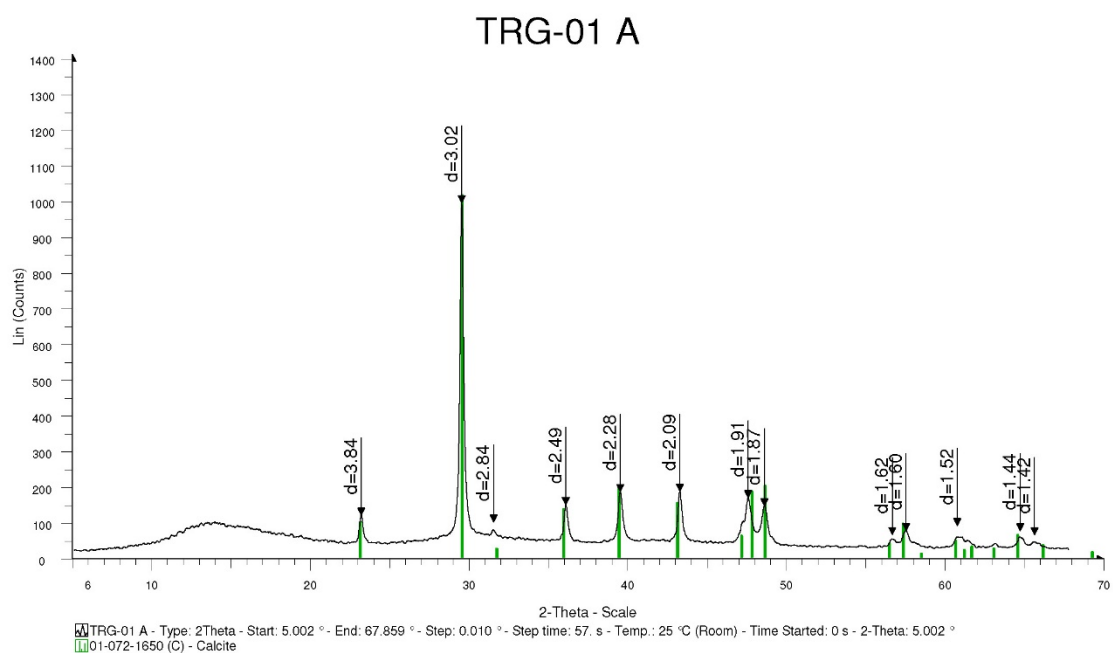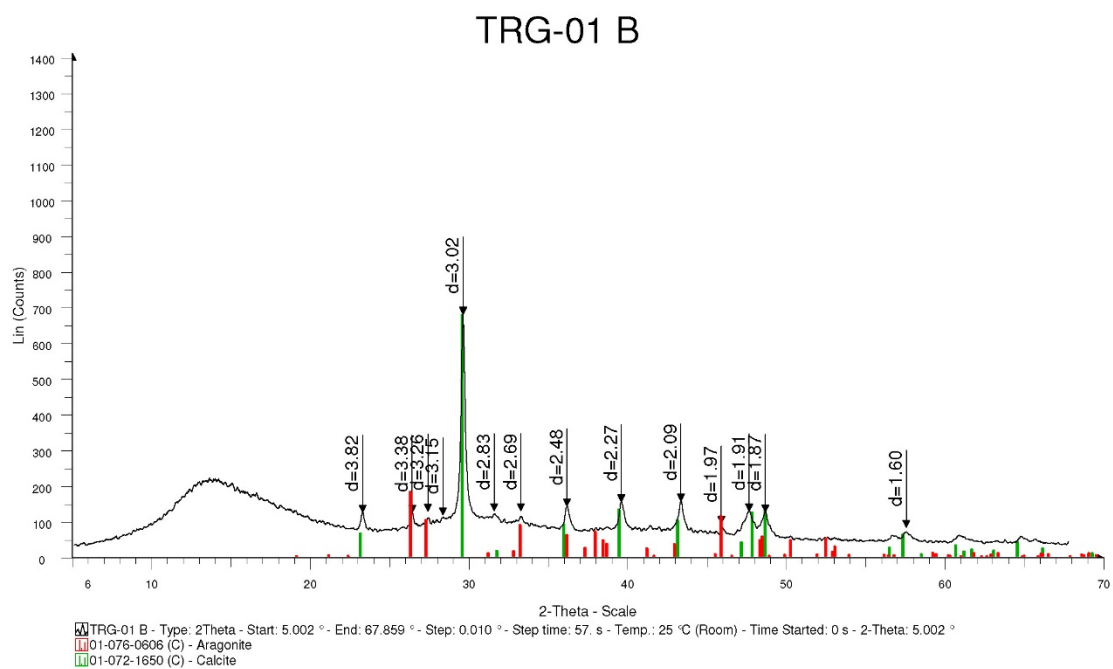

# TRG-01 C

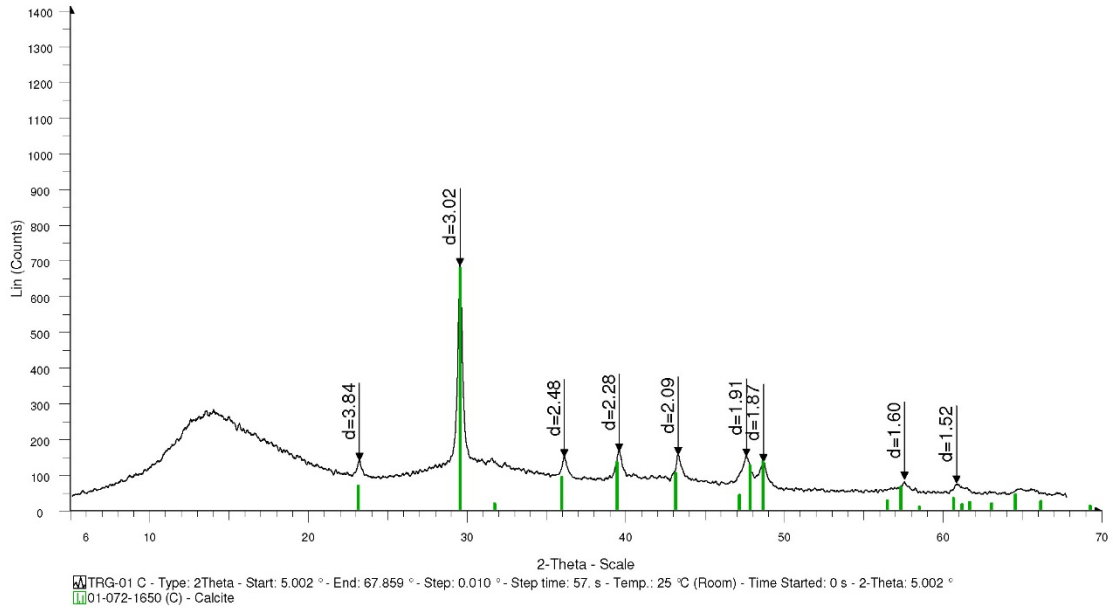

# TRG-02

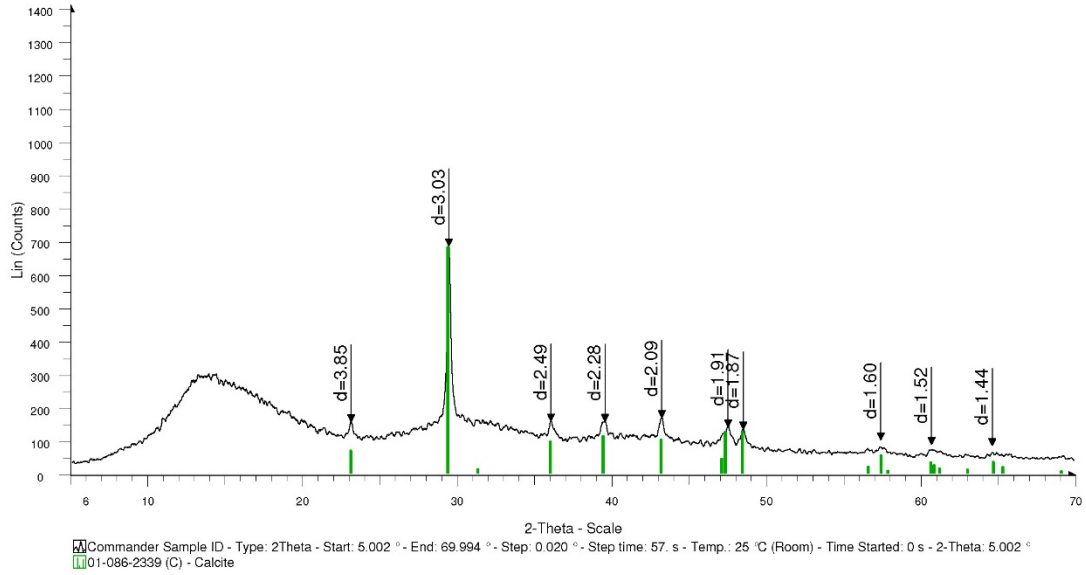

# TRG-03 A

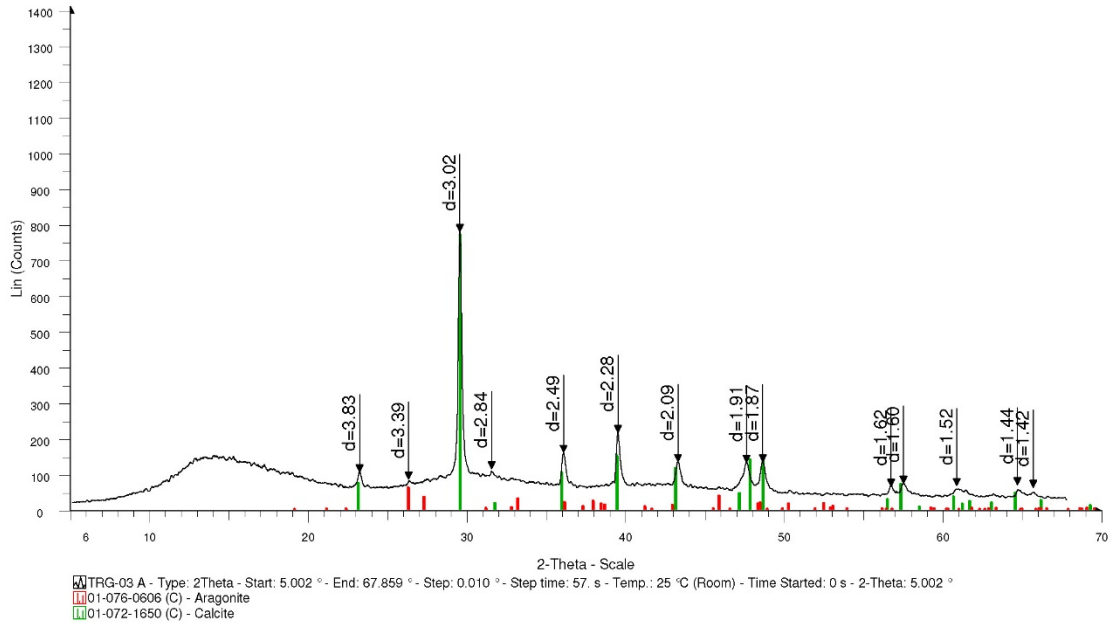

# TRG-03 B

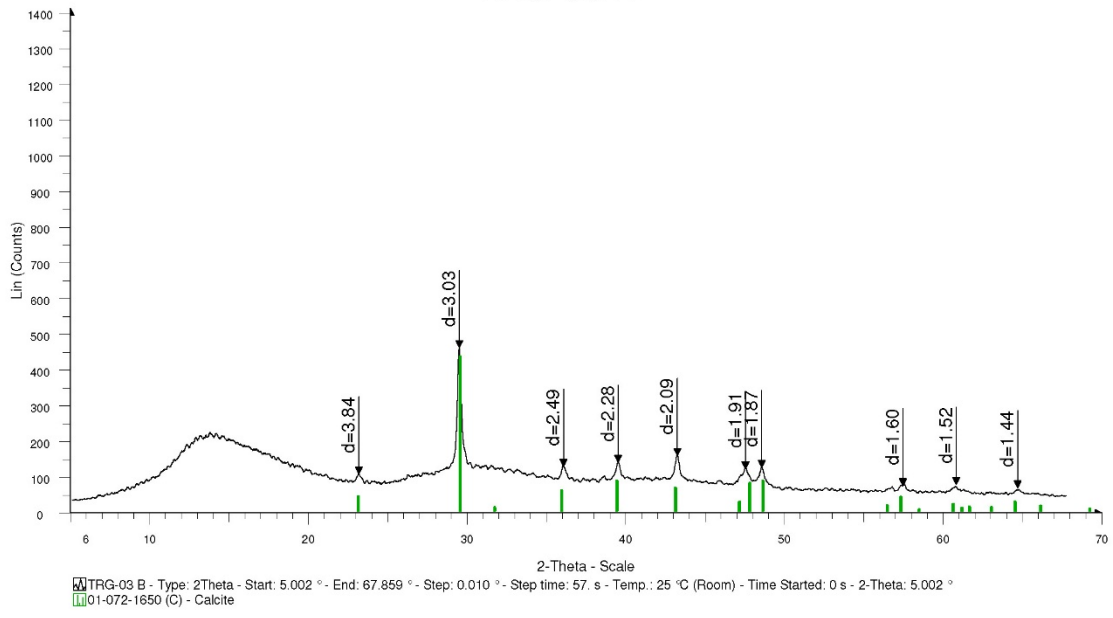



### TRG-03 C

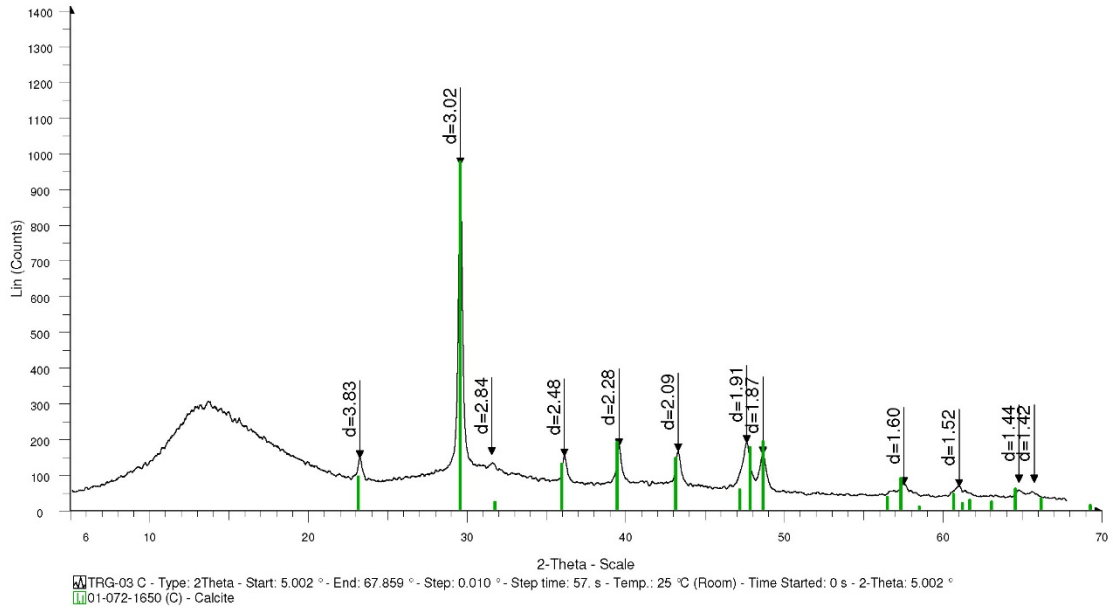

### TRG-04 A

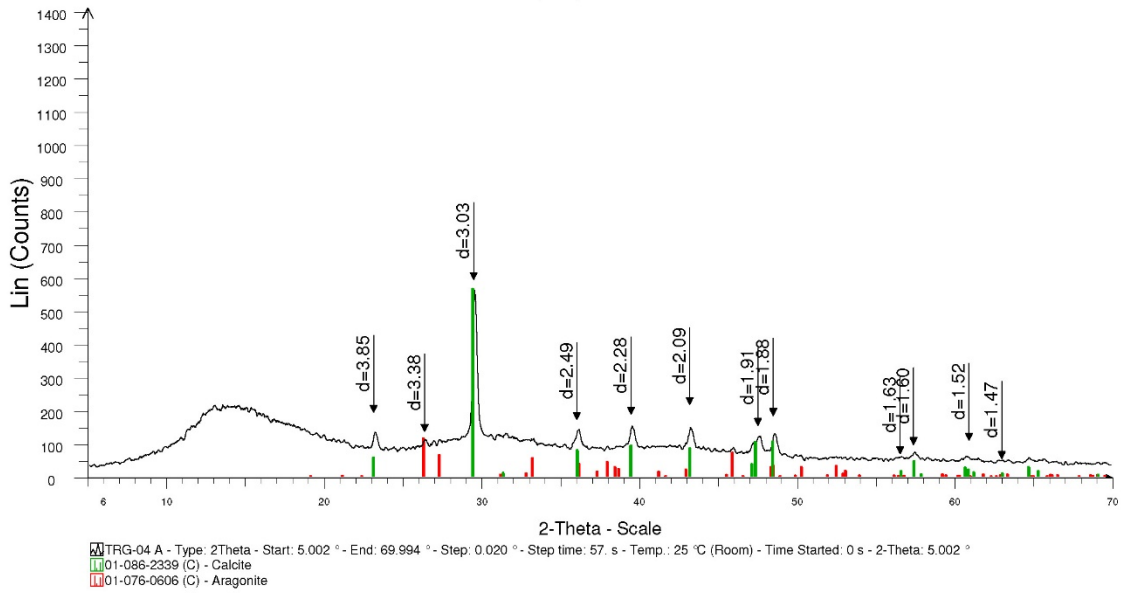

### TRG-04 B

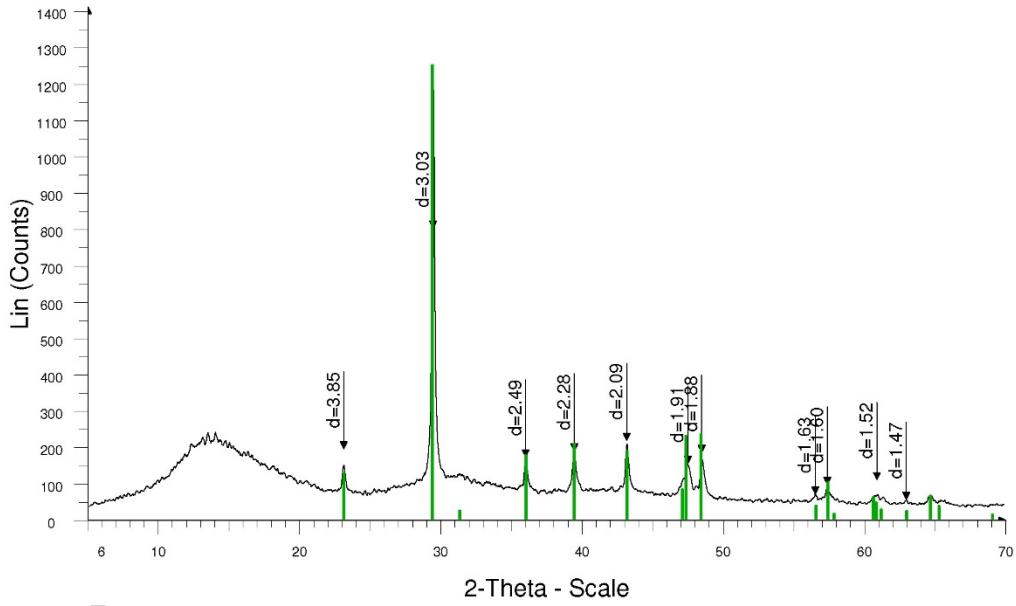

TRG-04 B - Type: 2Theta - Start: 5.002 ° - End: 69.994 ° - Step: 0.020 ° - Step time: 57. s - Temp.: 25 °C (Room) - Time Started: 0 s - 2-Theta: 5.002 °  
Operations: Smooth 0.150 | Import  
01-086-2339 (C) - Calcite

### TRG-04 C

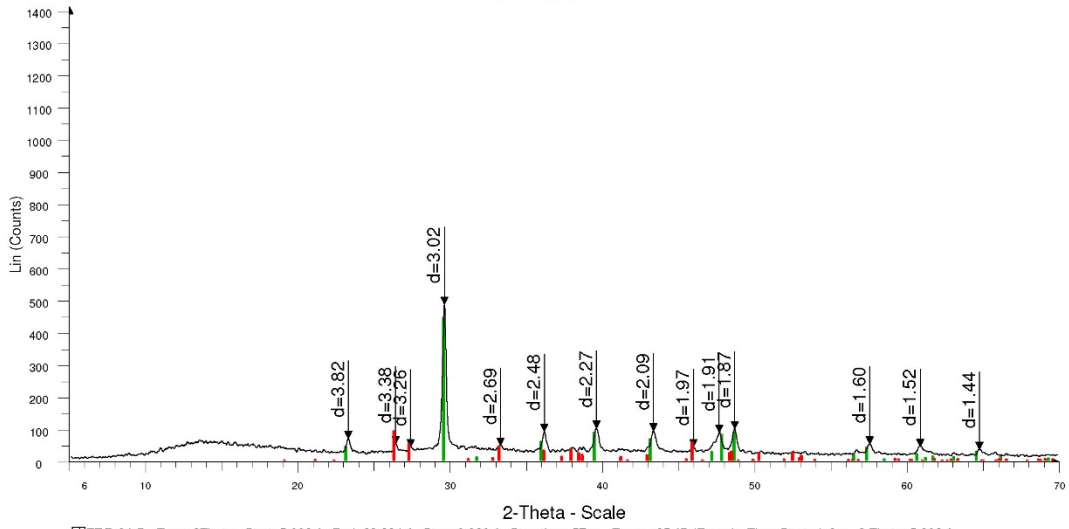

TRG-04 C - Type: 2Theta - Start: 5.002 ° - End: 69.994 ° - Step: 0.020 ° - Step time: 57. s - Temp.: 25 °C (Room) - Time Started: 0 s - 2-Theta: 5.002 °  
01-076-0606 (C) - Aragonite  
01-072-1650 (C) - Calcite

# TRG-04 D

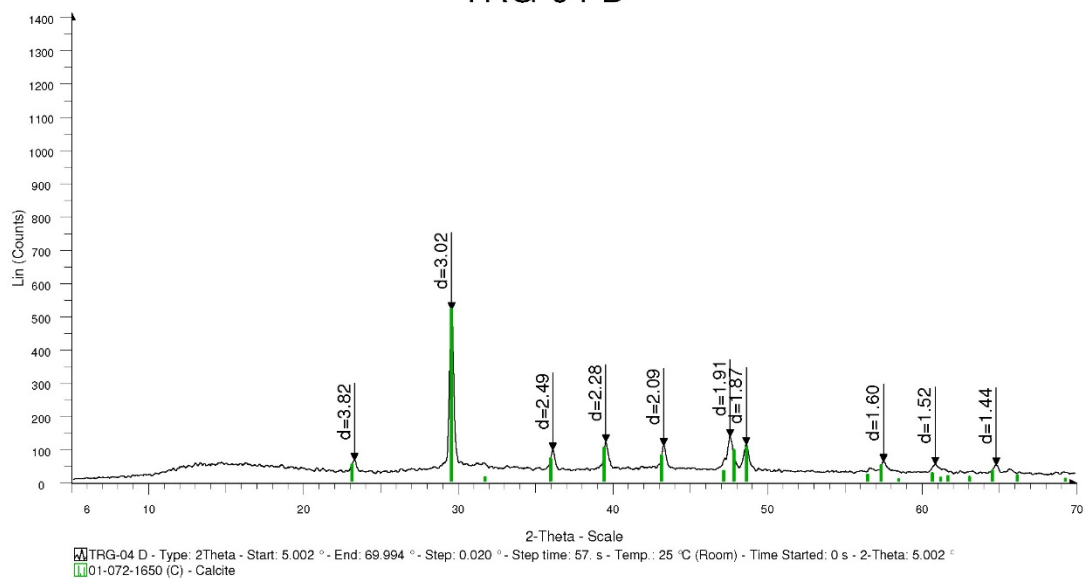

# TRG-05

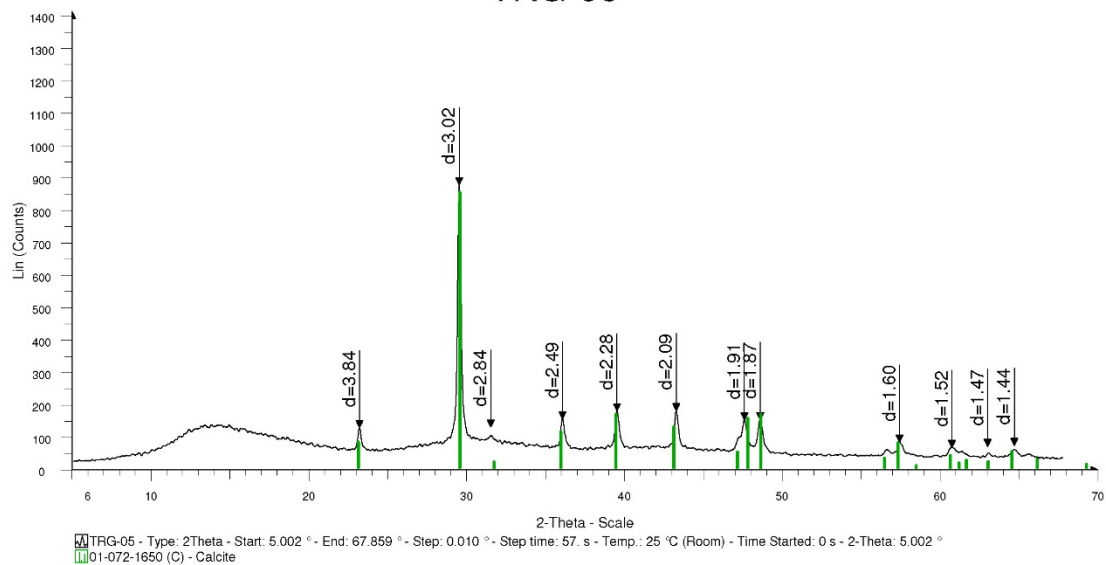

Supplementary Figure S9: a) Short columnar calcite crystals alternating with brown micritic bands constitute the first calcite precipitates over the host rock. Plane polarised light (PPL); b) columnar calcite crystals predominantly oriented towards the right (downslope). The growth of the crystal on the center crosscut the direction of growth of previous crystals. Crossed polarised light (XPL); c) oriented columnar calcite crystals displaying signs of dissolution. Occasionally, both crystal layers are separated by a thin, wavy micritic layer possibly indicating dissolution processes (PPL); d) aragonite-calcite layered textures (right) and secondary calcite crystals with aragonite relicts, some of them arranged in fans aligned forming a band (PPL); e) secondary calcite showing abundant aragonite relicts and very anhedral textures (PPL); f) same image as e, under crossed polarised light.

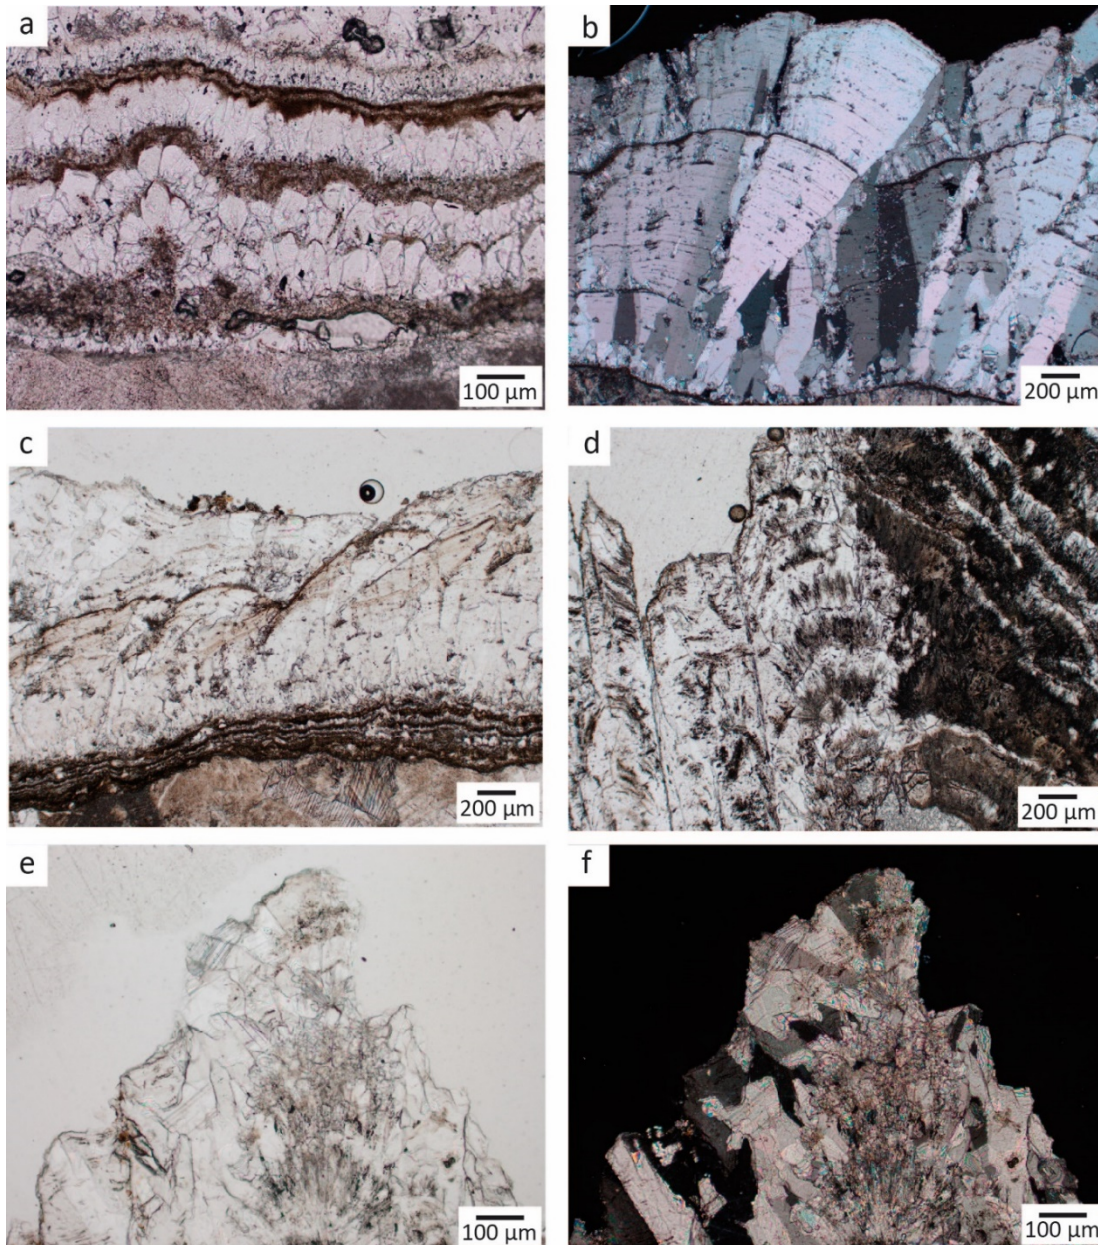

Supplementary Figure S10: The columnar and elongated columnar calcites oriented downslope (plane polarised light – above, and crossed polarised light – below)

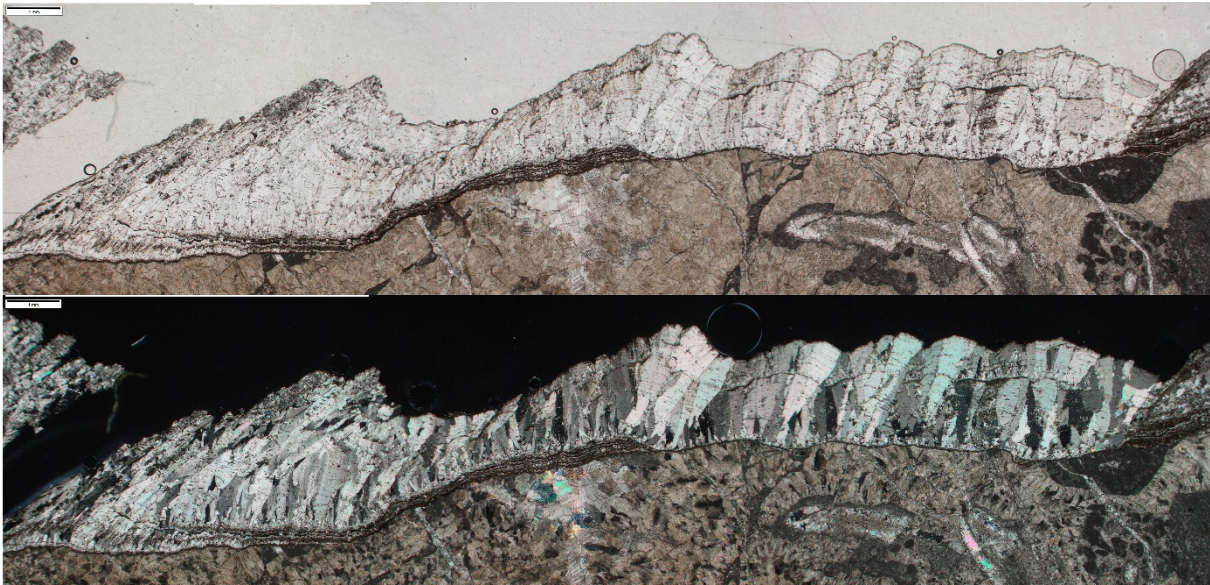

Supplementary Figure S11: The photograph and  $^{14}\text{C}$  results of dated moraine organic matter by Karsten Grunewald and his team in the laboratory in Erlangen.

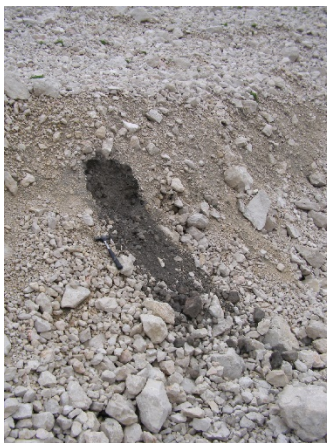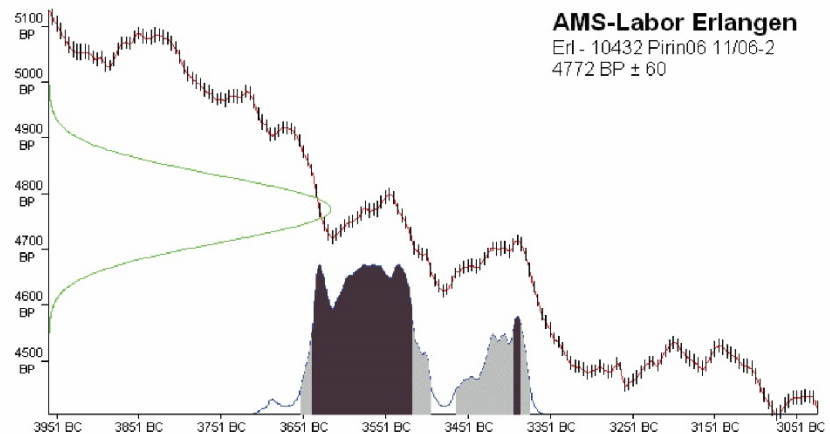

Die Probe wurde gemessen zu 4772  $\pm$  60 Radiokarbonjahren.

Das entspricht einem kalibrierten Alter in folgenden Bereichen:

Mit 68,3 % Wahrscheinlichkeit (1 Sigma):

|                   |       |
|-------------------|-------|
| 3640 BC - 3519 BC | 65,6% |
| 3395 BC - 3388 BC | 2,7%  |

Mit 95,4 % Wahrscheinlichkeit (2 Sigma):

|                   |       |
|-------------------|-------|
| 3654 BC - 3496 BC | 74,3% |
| 3465 BC - 3376 BC | 21,1% |

Kalibrierungsdatensatz aus: Reimer et al., IntCal04 Terrestrial Radiocarbon Age Calibration, 0–26 cal kyr BP, Radiocarbon, 46: (3), (2004), 1029–1058; ""

Supplementary Table S1:  $\delta^{13}\text{C}$  and  $\delta^{18}\text{O}$  stable isotope ratios.

| <b>Sample</b> | <b><math>\delta^{13}\text{C}</math> (‰<br/>PDB)</b> | <b><math>\delta^{18}\text{O}</math> (‰ PDB)</b> |
|---------------|-----------------------------------------------------|-------------------------------------------------|
| T.01_a        | 2.41                                                | -2.84                                           |
| T.03_a        | 1.35                                                | -4.71                                           |
| T.03_b        | 0.51                                                | -5.45                                           |
| T.04_c        | 1.50                                                | -3.96                                           |
| T.05_a        | 0.98                                                | -4.63                                           |

Supplementary Table S2: U-Th data for the subglacial calcite. Note: Ratios in parentheses are activity ratios calculated from the atomic ratios. Errors are at 2 $\sigma$  level. The ages are calculated using the Isoplot 3.75 Program of Ludwig (2012)(Ludwig, 2012) with decay constants from Cheng et al. (2000)(Cheng et al., 2000). Corrected Ages were calculated assuming initial/detrital  $^{230}\text{Th}/^{232}\text{Th}$  activity ratio equal  $0.825 \pm 50\%$  (the bulk-Earth value, which is the most commonly used for initial/detrital  $^{230}\text{Th}$  corrections).

U-Th dating was carried out using a Nu Plasma multi-collector inductively-coupled plasma mass spectrometer (MC-ICP-MS) in the Radiogenic Isotope Facility (RIF) at the School of Earth and Environmental Sciences, The University of Queensland (UQ) following chemical treatment procedures and MC-ICP-MS analytical protocols described elsewhere(Clark et al., 2012; Clark et al., 2014; Zhao et al., 2009). Powdered or chipped sub-samples weighing 16–78 mg were spiked with a mixed  $^{229}\text{Th}$ - $^{233}\text{U}$  tracer and then completely dissolved in concentrated  $\text{HNO}_3$ . After digestion, each sample was treated with  $\text{H}_2\text{O}_2$  to decompose trace amounts of organic matters (if any) and to facilitate complete sample-tracer homogenisation. U and Th were separated using conventional anion-exchange column chemistry using Bio-Rad AG 1-X8 resin. After stripping off the matrix from the column using double-distilled 7N  $\text{HNO}_3$  as eluent, 3 ml of a 2%  $\text{HNO}_3$  solution mixed with trace amount of HF was used to elute both U and Th into a 3.5-ml pre-cleaned test tube, ready for MC-ICP-MS analyses, without the need for further drying down and re-mixing. After column chemistry, the U-Th mixed solution was injected into the MC-ICP-MS through a DSN-100 desolvation nebuliser system with an uptake rate of around 0.07 ml per minute. U-Th isotopic ratio measurement was performed on the MC-ICP-MS using a detector configuration to allow simultaneous measurements of both U and Th isotopes(Clark et al., 2014; Zhou et al., 2011). The  $^{230}\text{Th}/^{238}\text{U}$  and  $^{234}\text{U}/^{238}\text{U}$  activity ratios of the samples were calculated using the decay constants given in(Cheng et al., 2000). The non-radiogenic  $^{230}\text{Th}$  was corrected using an assumed bulk-Earth atomic  $^{230}\text{Th}/^{232}\text{Th}$  ratio of  $4.4 \pm 2.2 \times 10^{-6}$ . U-Th ages were calculated using the Isoplot/Ex 3.75 Program(Ludwig, 2012).

| Sample Name         | Sample wt.(g) | U (ppm) | ±2s     | <sup>232</sup> Th (ppb) | ±2s    | ( <sup>230</sup> Th/ <sup>232</sup> Th) | ±2s   | ( <sup>230</sup> Th/ <sup>238</sup> U) | ±2s     | ( <sup>234</sup> U/ <sup>238</sup> U) | ±2s    | uncorr. <sup>230</sup> Th Age (ka) | ±2s    | corr. <sup>230</sup> Th Age (ka) | ±2s           | corr. Initial ( <sup>234</sup> U/ <sup>238</sup> U) | ±2s    |
|---------------------|---------------|---------|---------|-------------------------|--------|-----------------------------------------|-------|----------------------------------------|---------|---------------------------------------|--------|------------------------------------|--------|----------------------------------|---------------|-----------------------------------------------------|--------|
| T.01_a1             | 0,06022       | 0,45584 | 0,00019 | 20,522                  | 0,019  | 10,945                                  | 0,047 | 0,1624                                 | 0,0007  | 0,9787                                | 0,0012 | 19,83                              | 0,10   | <b>18,45</b>                     | <b>0,70</b>   | 0,9773                                              | 0,0013 |
| T.03_a1             | 0,07823       | 0,41066 | 0,00017 | 7,454                   | 0,012  | 19,219                                  | 0,103 | 0,1150                                 | 0,0006  | 1,0053                                | 0,0005 | 13,26                              | 0,07   | <b>12,72</b>                     | <b>0,28</b>   | 1,0055                                              | 0,0006 |
| T.03_a2             | 0,02380       | 0,8933  | 0,0003  | 4,929                   | 0,005  | 19,99                                   | 0,23  | 0,0363                                 | 0,0004  | 1,0062                                | 0,0011 | 4,012                              | 0,047  | <b>3,849</b>                     | <b>0,094</b>  | 1,0063                                              | 0,0011 |
| T.03_b1             | 0,01620       | 1,7737  | 0,0005  | 4,080                   | 0,005  | 24,49                                   | 0,23  | 0,0186                                 | 0,0002  | 1,0079                                | 0,0008 | 2,027                              | 0,019  | <b>1,959</b>                     | <b>0,039</b>  | 1,0079                                              | 0,0008 |
| T.05                | 0,02151       | 1,3305  | 0,0004  | 68,59                   | 0,11   | 12,20                                   | 0,05  | 0,2072                                 | 0,0008  | 1,0060                                | 0,0010 | 25,15                              | 0,11   | <b>23,62</b>                     | <b>0,78</b>   | 1,0065                                              | 0,0011 |
| HU-1 standard       | 0,03057       | 0,7511  | 0,0003  | 0,0660                  | 0,0006 | 34680                                   | 342   | 1,0036                                 | 0,0026  | 1,0013                                | 0,0011 | <b>Secular equilibrium</b>         |        |                                  |               |                                                     |        |
| HU-1 standard       | 0,03538       | 0,7542  | 0,0003  | 0,1994                  | 0,0008 | 11439                                   | 53    | 0,9969                                 | 0,0024  | 1,0006                                | 0,0009 | <b>Secular equilibrium</b>         |        |                                  |               |                                                     |        |
| YB-1 standard       | 0,09094       | 0,1293  | 0,0001  | 0,5889                  | 0,0012 | 291,3                                   | 1,3   | 0,4371                                 | 0,0018  | 1,7452                                | 0,0018 | 30,79                              | 0,15   | <b>30,71</b>                     | <b>0,15</b>   | 1,8136                                              | 0,0020 |
| YB-1 standard       | 0,10259       | 0,1292  | 0,0001  | 0,6118                  | 0,0012 | 278,6                                   | 1,3   | 0,4348                                 | 0,0019  | 1,7445                                | 0,0020 | 30,62                              | 0,15   | <b>30,54</b>                     | <b>0,16</b>   | 1,8126                                              | 0,0022 |
| SRM-960 standard    | 0,10570       | 5,5396  | 0,0046  | 0,01                    | 0,000  | 1485                                    | 28    | 0,00071                                | 0,00001 | 0,9636                                | 0,0007 | 0,0805                             | 0,0009 | <b>0,0805</b>                    | <b>0,0009</b> | 0,9636                                              | 0,0007 |
| YB-1 speleothem std | 0,10214       | 0,1253  | 0,0000  | 0,49                    | 0,001  | 339,8                                   | 1,2   | 0,4343                                 | 0,0015  | 1,7492                                | 0,0013 | 30,53                              | 0,12   | <b>30,46</b>                     | <b>0,12</b>   | 1,8174                                              | 0,0014 |



## REFERENCES:

- Cheng, H., Edwards, R. L., Hoff, J., Gallup, C. D., Richards, D. A., and Asmerom, Y.: The half-lives of uranium-234 and thorium-230, *Chemical Geology*, 169, 17-33, doi:10.1016/s0009-2541(99)00157-6, 2000.
- Clark, T. R., Zhao, J.-x., Feng, Y.-x., Done, T. J., Jupiter, S., Lough, J., and Pandolfi, J. M.: Spatial variability of initial  $^{230}\text{Th}/^{232}\text{Th}$  in modern Porites from the inshore region of the Great Barrier Reef, *Geochimica et Cosmochimica Acta*, 78, 99-118, doi:10.1016/j.gca.2011.11.032, 2012.
- Clark, T. R., Zhao, J.-x., Roff, G., Feng, Y.-x., Done, T. J., Nothdurft, L. D., and Pandolfi, J. M.: Discerning the timing and cause of historical mortality events in modern Porites from the Great Barrier Reef, *Geochimica et Cosmochimica Acta*, 138, 57-80, doi:10.1016/j.gca.2014.04.022, 2014.
- Gabrovec, M., Hrvatinić, M., Komac, B., Ortarić, J., Pavšek, M., Topole, M., Triglav Čekada, M., and Zorn, M.: Triglavski ledenik, Založba ZRC, Ljubljana, 2014.
- Ludwig, K. R.: User's manual for Isoplot version 3.75–4.15: a geochronological toolkit for Microsoft Excel, Berkeley Geochronological Center Special Publication, 5, 2012.
- Zhao, J.-x., Yu, K.-f., and Feng, Y.-x.: High-precision  $^{238}\text{U}$ – $^{234}\text{U}$ – $^{230}\text{Th}$  disequilibrium dating of the recent past: a review, *Quaternary Geochronology*, 4, 423-433, doi:10.1016/j.quageo.2009.01.012, 2009.
- Zhou, H., Zhao, J., Qing, W., Feng, Y., and Tang, J.: Speleothem-derived Asian summer monsoon variations in Central China, 54-46 ka, *Journal of Quaternary Science*, 26, 781-790, doi:10.1002/jqs.1506, 2011.
